# Supplementary material for: Influence of Tillage and Cropping Systems on Soil Properties and Crop Performance under Semi-Arid Conditions
Source: MDPI journal article supplement (doi:10.3390/su141811651), 2022-09-16
Supplement: s1 [file s1]

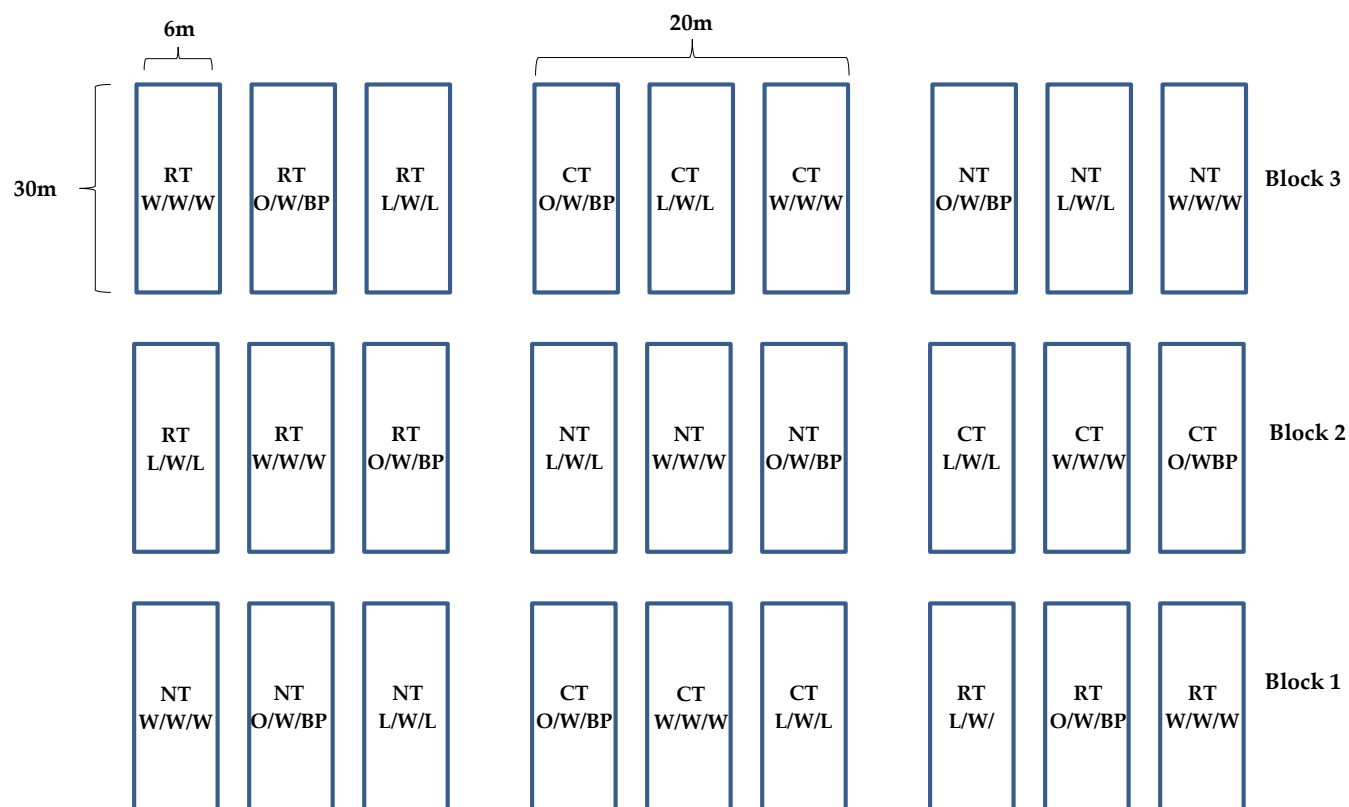

**Figure S1.** Layout of the experiment presents three tillage systems (no-tillage (NT), reduced tillage (RT), and conventional tillage (CT)) in the main plots, while the cropping system (wheat/wheat/wheat (W/W/W), lentil/wheat/lentil (L/W/L) and oat/wheat/barley-pea (O/W/BP) was located in subplots.

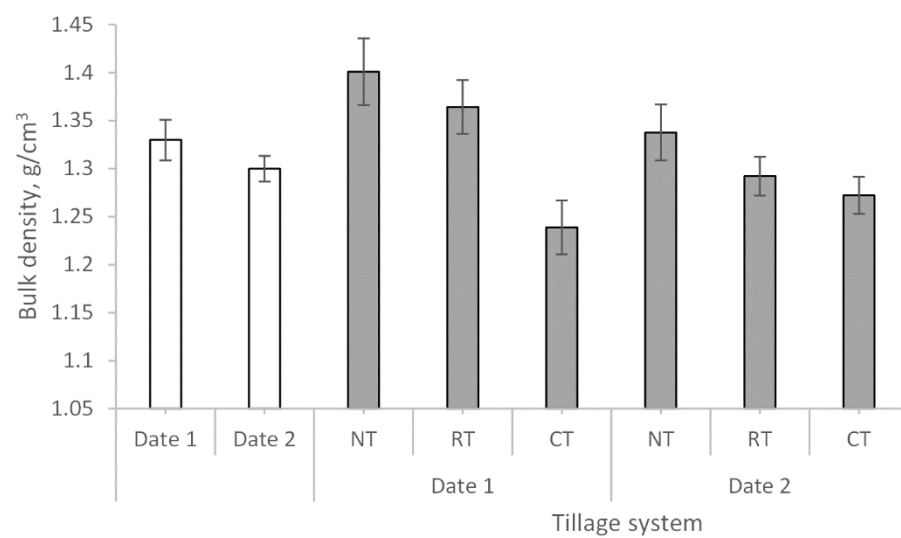

**Figure S2.** Bulk density comparison at 0-7 cm between no-tillage (NT), reduced tillage (RT), and conventional tillage (CT) at the beginning (Date 1) and the end of the cropping season (Date 2). Bars are standard error of the mean (SEM).

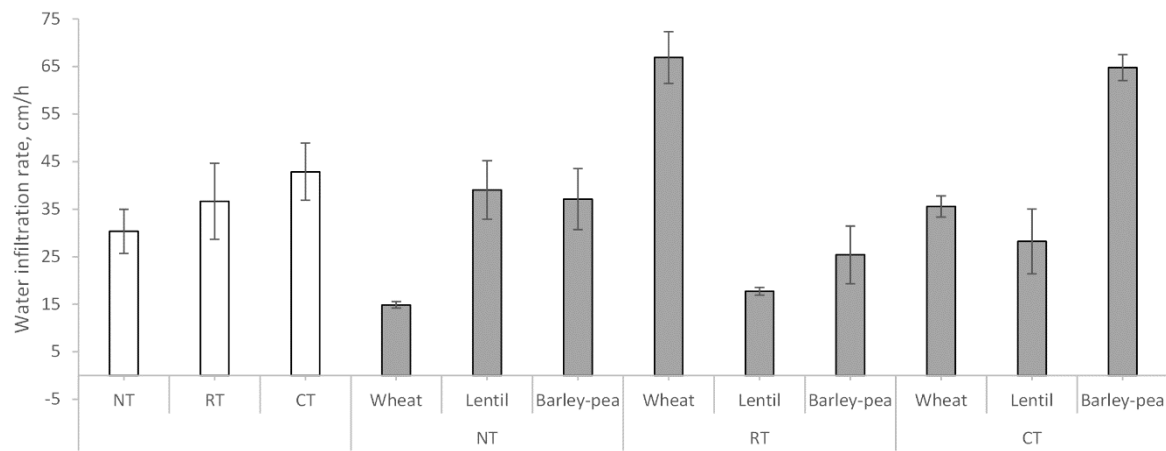

**Figure S3.** Water infiltration rate under tillage (NT), reduced tillage (RT) and conventional tillage (CT), and under different crops; wheat, lentil, and barley-pea. Bars are standard error of the mean (SEM).
